# Supplementary material
Source: PubMed Central journal article supplement (PMC6084792)
Supplement: NIHMS975849-supplement-1.pdf [file NIHMS975849-supplement-1.pdf]

hcGAS 1 MQPWHGKAMQRASEAGATAPKASARNARGAPMDPTESPAAPEAALPKAGKF GPARKSGSR 60  
 mcGAS 1 MEDPRRRRT - - - - - TAPRAKKPSAKRAPTQPSRTRAHAESC - - - - - GPQRGARSR 44

hcGAS 61 QKKSAPDTQERPPVVRATGARAK - - KAPQRAQDTQPSDATSAPGAEG - - - - - LE 106  
 mcGAS 45 RAERDGDITTEKP - - RAPGPRVHPARATELTKDAQPS - AMDAAGATARPAVRVPQQQA I LD 101

hcGAS 107 P - - PAAREP - - - ALSRA - - - - - GSCRQRGARCSTKPRPPPGPWDVPSGLPVSAPI LVRR 156  
 mcGAS 102 PELPAVREPQPPADPEARKVVRGSPSHRRGARSTGQPRAPRGRSKE - - - - - 146

Enzymatic domain  
 hcGAS 157 DAAPGAS<sup>173</sup>KLRAVLEK<sup>174</sup>KLKLS<sup>176</sup>RDDIS<sup>180</sup>TAAGMV<sup>181</sup>KGVVDHLL<sup>195</sup>LRL - KCDSAFRQVGLLNTGSYY 215  
 mcGAS 147 PD - - - - - KLKVL<sup>173</sup>DKLRL<sup>174</sup>KR<sup>176</sup>KDIS<sup>180</sup>EAAETV<sup>181</sup>NK<sup>187</sup>VVERLL<sup>195</sup>RRMQKRESEFKGVEQLNTGSYY 201  
 hcGAS Strx

hcGAS 216 EHVKISAPNEFDVMFKLEVPRI<sup>217</sup>QLEEYSNTRAYYFVKFKRNPKENPLSQFLEGEILSASK 275  
 mcGAS 202 EHVKISAPNEFDVMFKLEVPRI<sup>236</sup>ELQEYYETGAFYLVKFKRIPRGNPLSHFLEGEVLSATK 261  
 hcGAS Strx

hcGAS 276 MLSKFRKIIKEEINDIKD<sup>328</sup>TDVIMKRKRGGSPAVTLLIS - - EKISVDITLALLESK<sup>328</sup>SWPAS 333  
 mcGAS 262 MLSKFRKIIKEEVKEIKDIDVSVEKEKPGSPAVTLLIRNPEEISVDIILALLESK<sup>328</sup>SWPIS 321  
 hcGAS Strx

hcGAS 334 TQEGLRIQNWL<sup>346</sup>SAKVR<sup>347</sup>KQL<sup>350</sup>RLKPFYLVPHAKEGNGFQEETWRLSFSHIE<sup>353</sup>ILNNHGKS 393  
 mcGAS 322 TKEGLPIQGWLG<sup>346</sup>TKVR<sup>347</sup>TNLR<sup>353</sup>REPFYLVPHAKDGN<sup>354</sup>SFQGETWRLSFSHTE<sup>384</sup>KYILNNHGE 381  
 hcGAS Strx

hcGAS 394 KTCCE<sup>397</sup>NKEEK<sup>403</sup>CCR<sup>407</sup>KDCL<sup>411</sup>KLMKYLLLEQLKERFKDKKHLDFSSYHVKTAFHHVCTQNPQDS 453  
 mcGAS 382 KTCCE<sup>397</sup>SSGAK<sup>403</sup>CCR<sup>407</sup>KECL<sup>411</sup>KLMKYLLLEQLKKEFQE - - LDAFCSYHVKTAFHFWTQDPQDS 438  
 hcGAS Strx

hcGAS 454 QWDRKDLGLCFDNCVTYFLQCLRTEKLENYFIPEFNLFSSNLIDKRSKEFLTKQIEYERN 513  
 mcGAS 439 QWDPRNLSSCFDKLLAFFLECLRTEKLDHYFIPKFNLFSSQELIDKRSKEFLSKKIEYERN 498  
 hcGAS Strx

hcGAS 514 NEFPVFDEF 522  
 mcGAS 499 NGFPIFDKL 507  
 hcGAS Strx
