# Supplementary material
Source: PubMed Central journal article supplement (PMC6084792)
Supplement: NIHMS975849-supplement-8.pdf [file NIHMS975849-supplement-8.pdf]

**Table S1. Crystallographic Statistics, Related to Figure 2**

|                                              | hcGAS–DNA              | hcGAS–DNA<br>ATP       |
|----------------------------------------------|------------------------|------------------------|
| <b>Data Collection</b>                       |                        |                        |
| Resolution (Å) <sup>a</sup>                  | 48.21–2.30 (2.38–2.30) | 49.15–2.79 (2.95–2.79) |
| Wavelength (Å)                               | 0.97918                | 0.97918                |
| Space group                                  | P 6 <sub>1</sub> 2 2   | P 6 <sub>1</sub> 2 2   |
| Unit cell: a, b, c (Å)                       | 101.17, 101.17, 241.06 | 100.49, 100.49, 236.75 |
| Unit cell: $\alpha$ , $\beta$ , $\gamma$ (°) | 90.0, 90.0, 120.0      | 90.0, 90.0, 120.0      |
| Molecules per ASU                            | 1                      | 1                      |
| No. reflections: total                       | 438690                 | 356853                 |
| No. reflections: unique                      | 33460                  | 18321                  |
| Completeness (%) <sup>a</sup>                | 99.6 (96.4)            | 99.8 (98.5)            |
| Multiplicity <sup>a</sup>                    | 13.1 (12.1)            | 19.5 (18.2)            |
| $I/\sigma^2$                                 | 10.9 (1.1)             | 10.0 (1.6)             |
| CC(1/2) <sup>b</sup> (%) <sup>a</sup>        | 99.8 (31.7)            | 99.8 (31.9)            |
| Rpim <sup>c</sup> (%) <sup>a</sup>           | 4.5 (79.6)             | 8.6 (118.0)            |
| <b>Refinement</b>                            |                        |                        |
| Resolution (Å)                               | 48.21–2.30             | 49.15–2.79             |
| Free reflections (%)                         | 10                     | 10                     |
| R-factor / R-free                            | 19.9 / 22.8            | 21.1 / 24.6            |
| Bond distance (RMS Å)                        | 0.006                  | 0.002                  |
| Bond angles (RMS °)                          | 0.720                  | 0.543                  |
| <b>Structure/Stereochemistry</b>             |                        |                        |
| No. atoms: protein                           | 2859                   | 2826                   |
| No. atoms: DNA                               | 592                    | 592                    |
| No. atoms: ligand                            | 1 (Zn)                 | 34 (ATP, Mg, Zn)       |
| No. atoms: water                             | 103                    | 21                     |
| Average B-factor: protein                    | 57.0                   | 66.1                   |
| Average B-factor: DNA                        | 98.2                   | 103.3                  |
| Average B-factor: ligand                     | 43.4                   | 56.3                   |
| Average B-factor: water                      | 53.7                   | 61.3                   |
| Ramachandran plot: favored                   | 97.93%                 | 96.71%                 |
| Ramachandran plot: allowed                   | 1.77%                  | 2.99%                  |
| Ramachandran plot: outliers                  | 0.30%                  | 0.30%                  |
| Rotamer outliers:                            | 1.87%                  | 1.57%                  |
| MolProbity <sup>d</sup> score                | 1.52                   | 1.46                   |
| Protein Data Bank ID                         | 6CT9                   | 6CTA                   |

<sup>a</sup> Highest resolution shell values in parenthesis

<sup>b</sup> (Karplus and Diederichs, 2012)

<sup>c</sup> (Weiss, 2001)

<sup>d</sup> (Chen et al., 2010)
