# Supplementary material
Source: PubMed Central journal article supplement (PMC6084792)

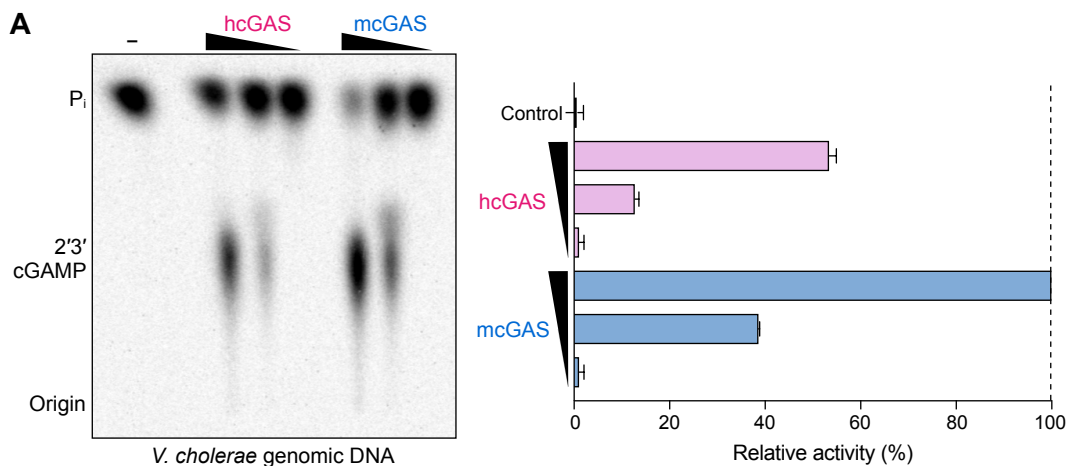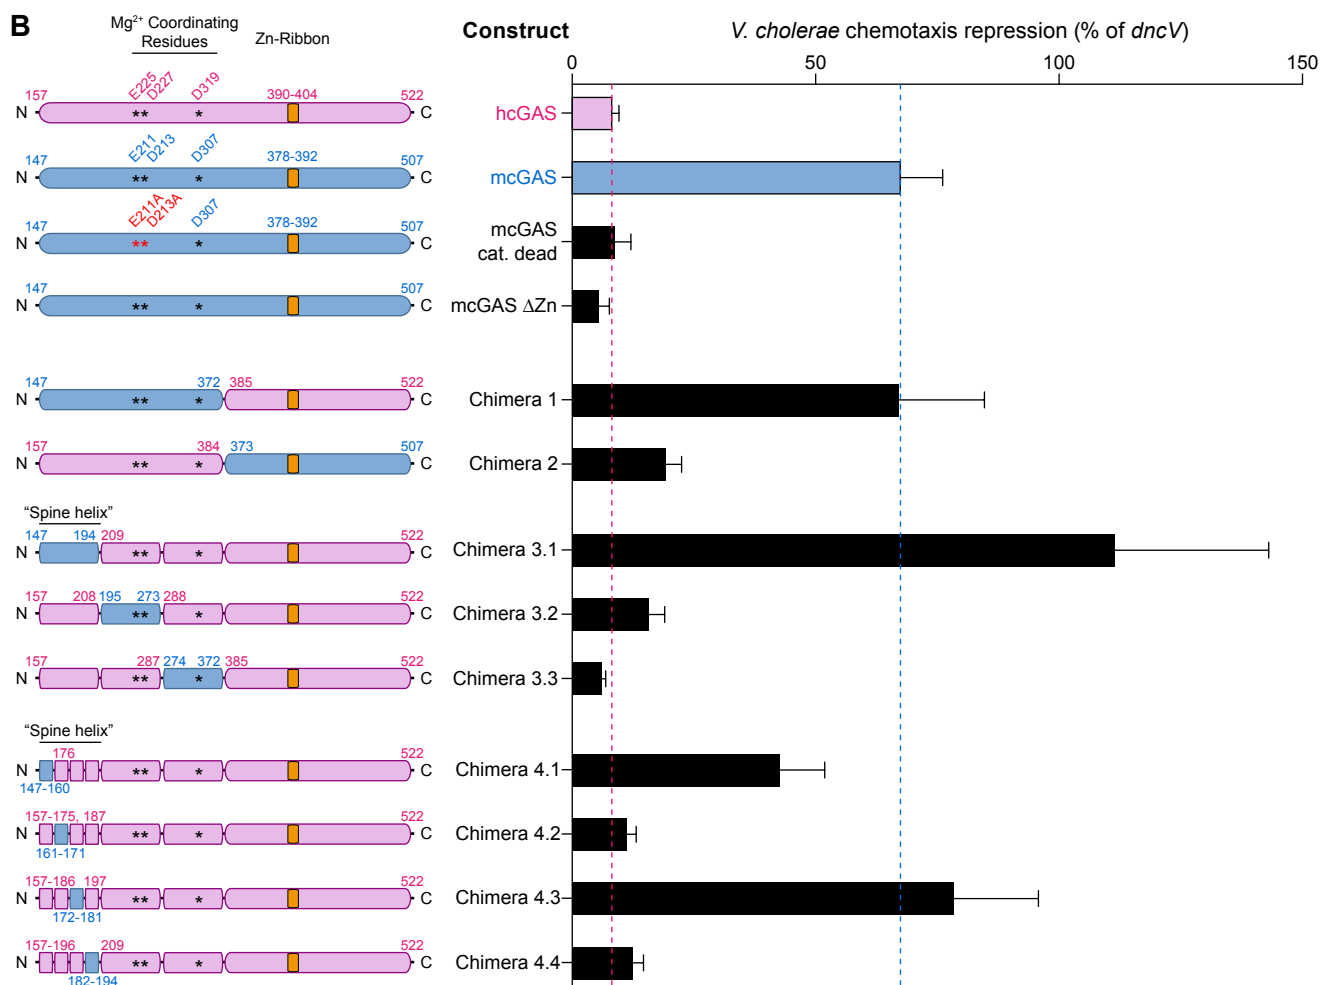

Supplement: NIHMS975849-supplement-2.pdf [file NIHMS975849-supplement-2.pdf]

**A**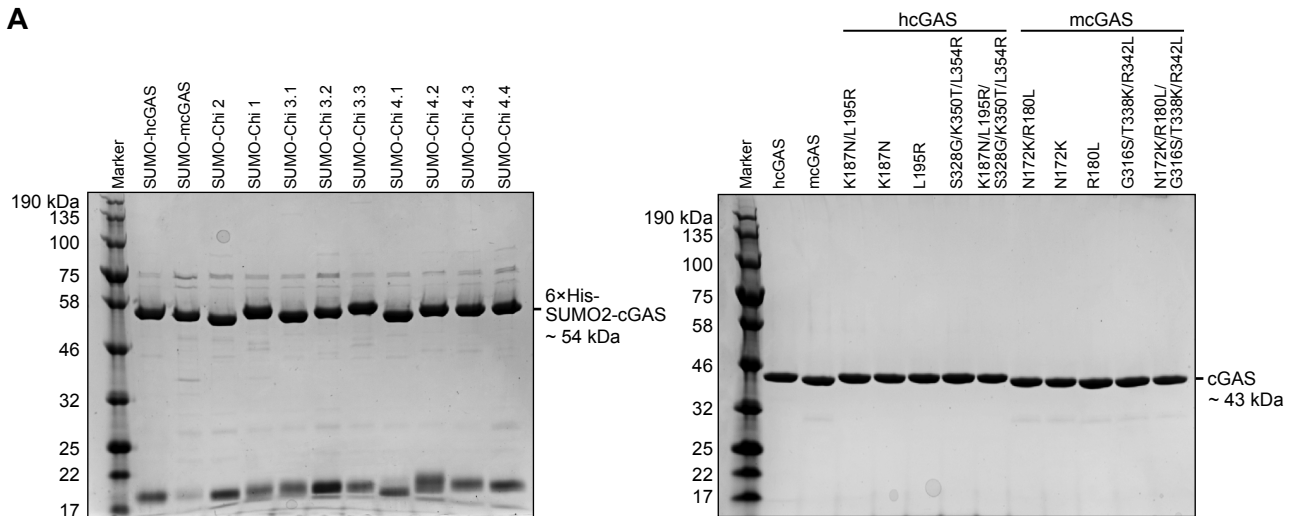**B**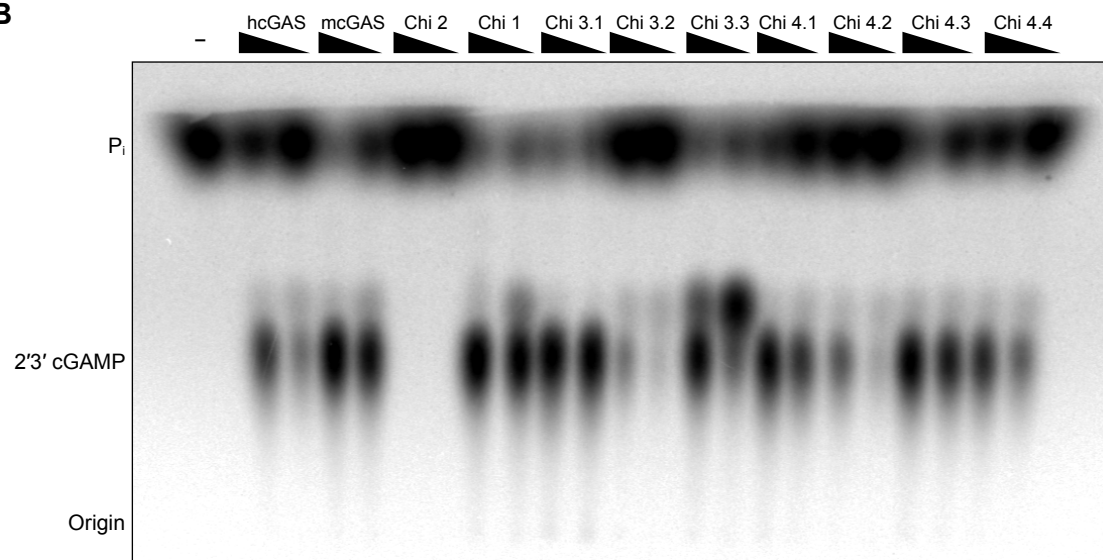

Supplement: NIHMS975849-supplement-3.pdf [file NIHMS975849-supplement-3.pdf]

**A**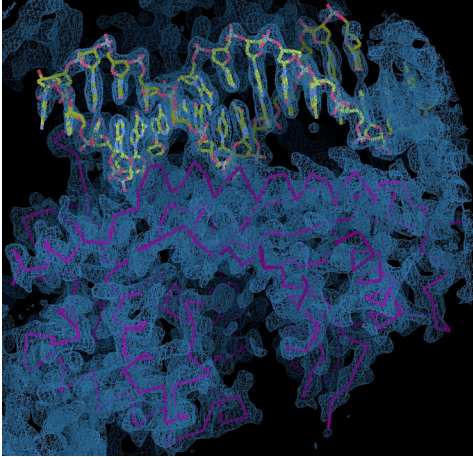**B**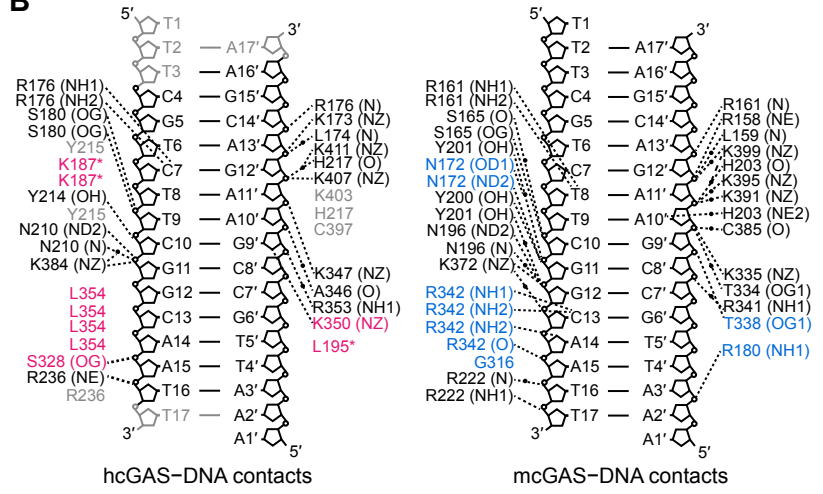**C**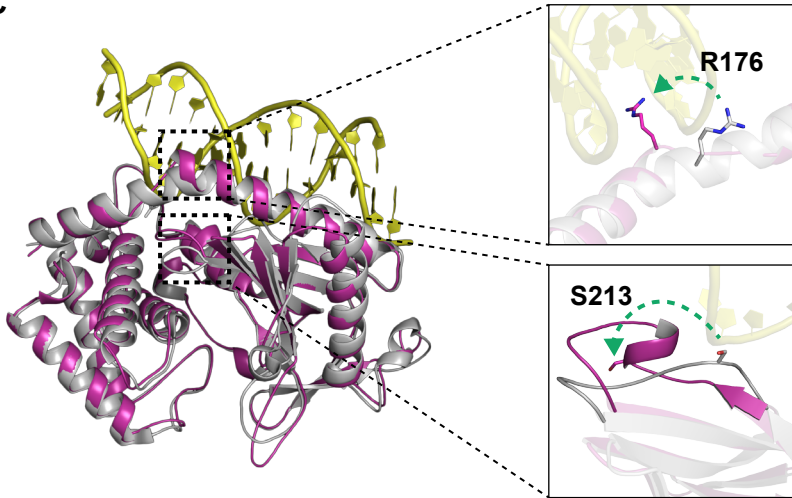**D**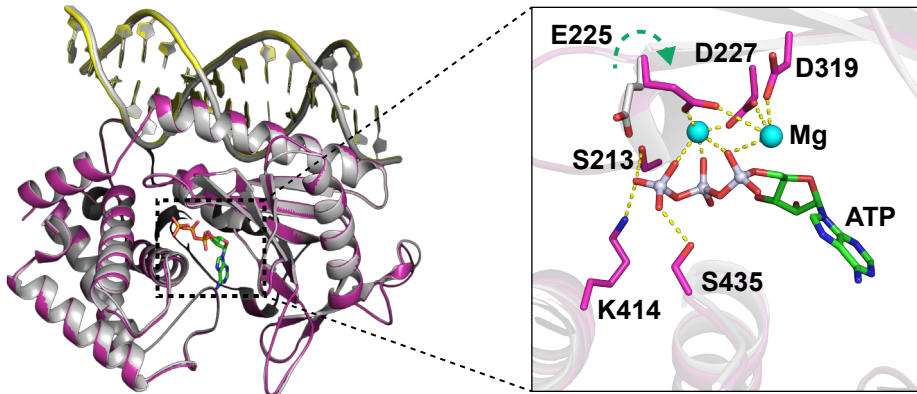

Supplement: NIHMS975849-supplement-4.pdf [file NIHMS975849-supplement-4.pdf]

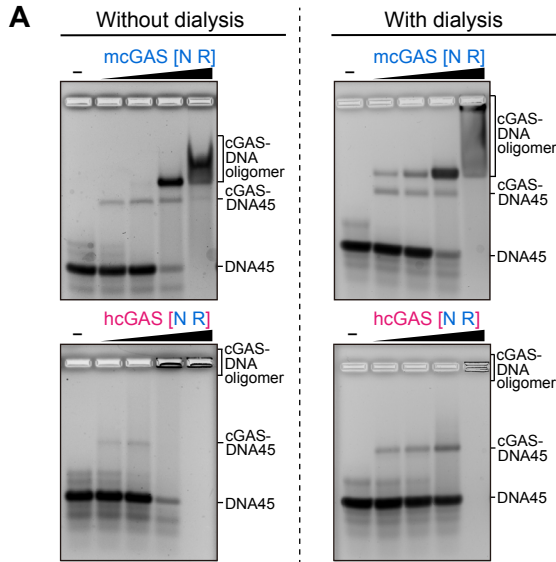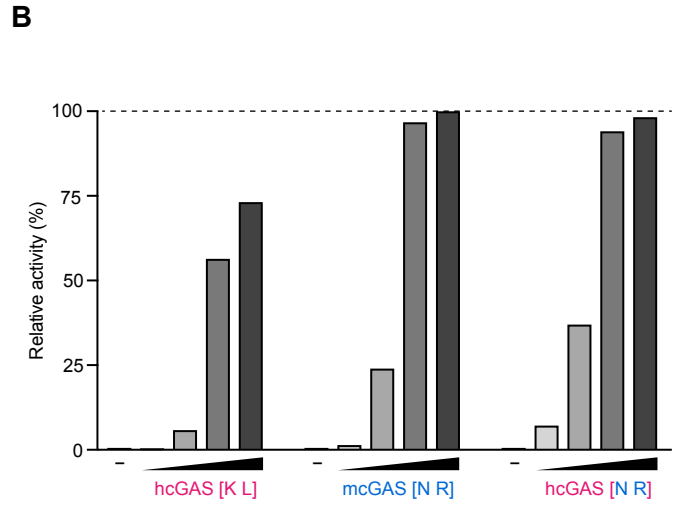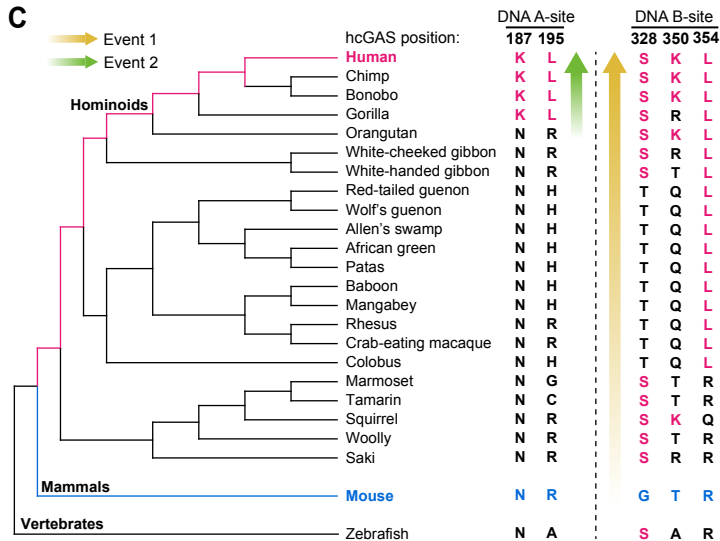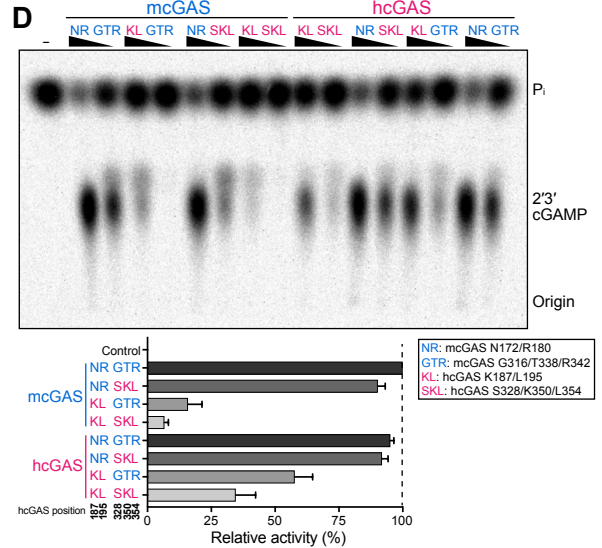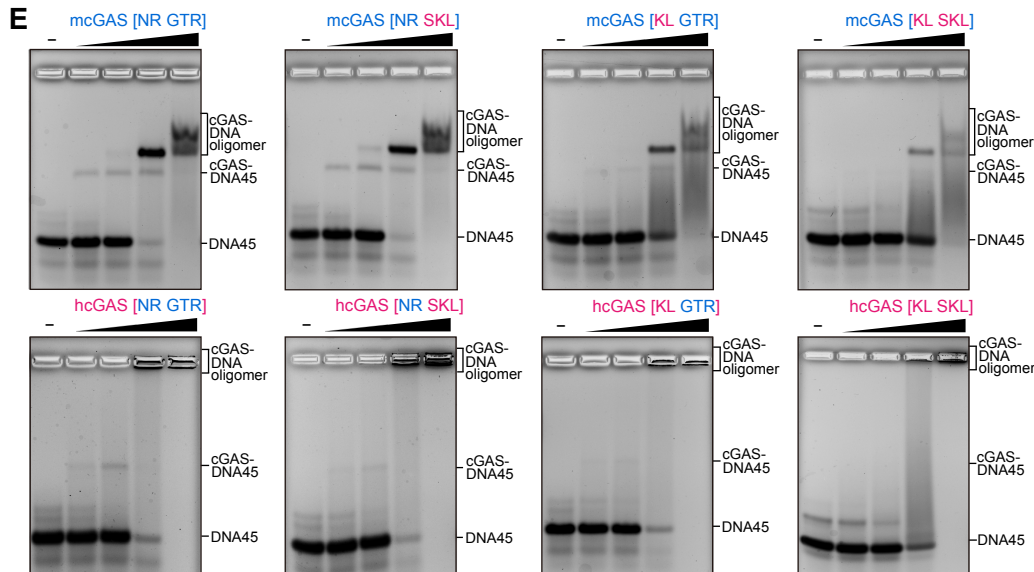

Supplement: NIHMS975849-supplement-5.pdf [file NIHMS975849-supplement-5.pdf]

**A**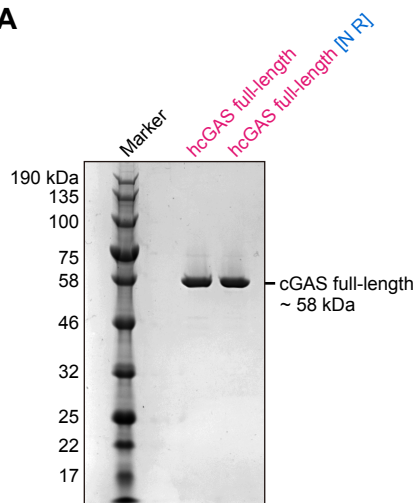**B**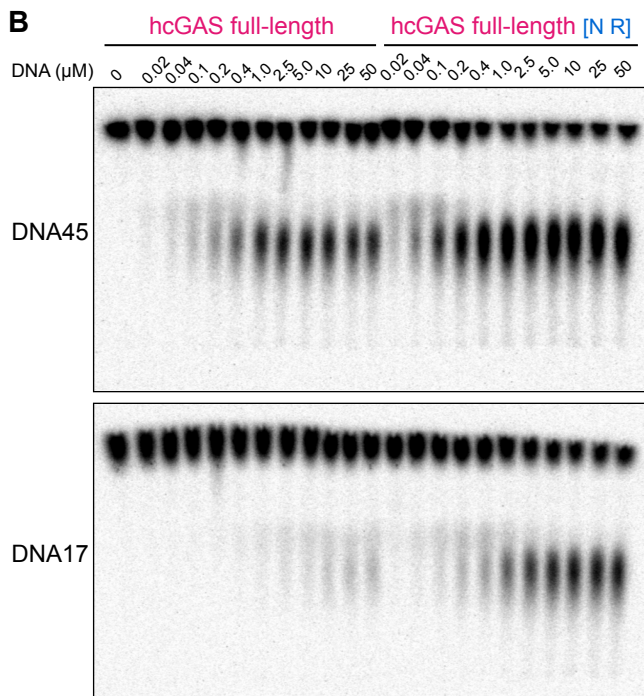**C**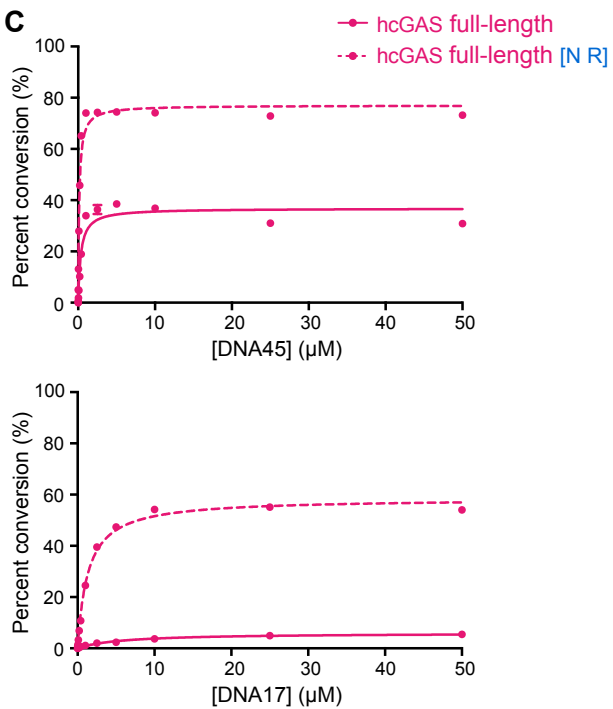

Supplement: NIHMS975849-supplement-6.pdf [file NIHMS975849-supplement-6.pdf]

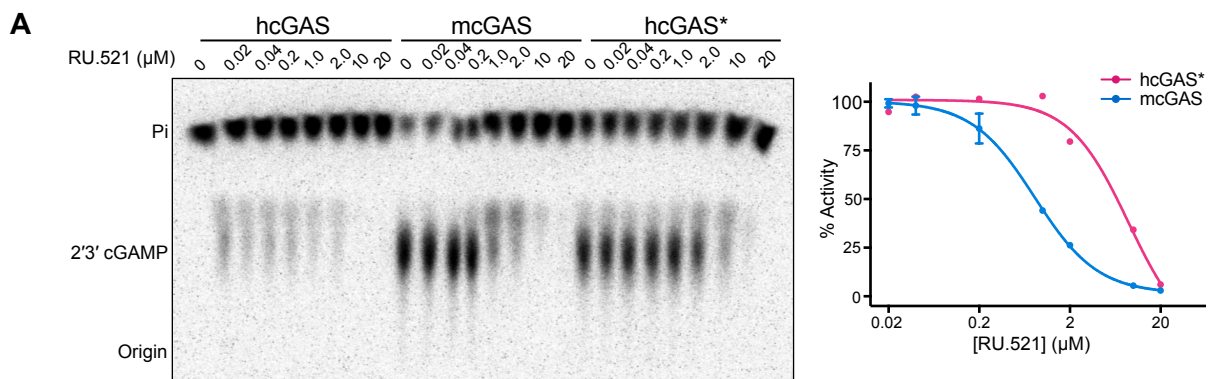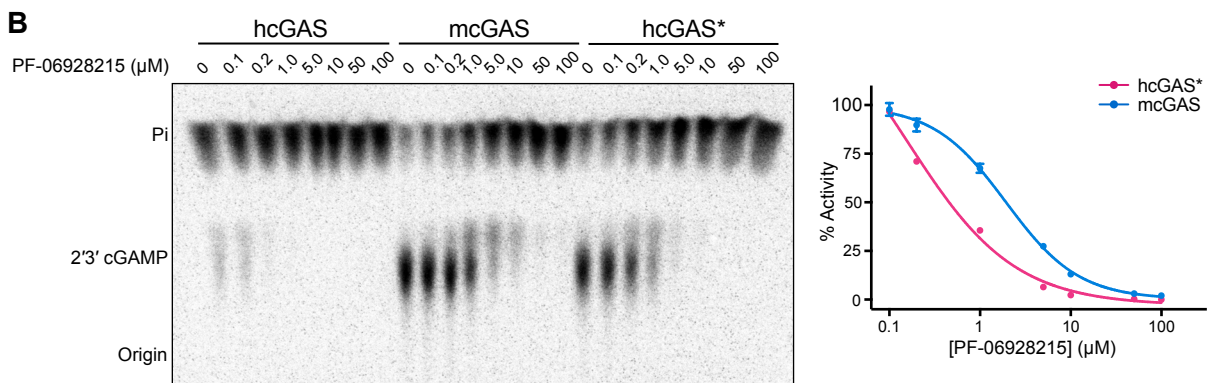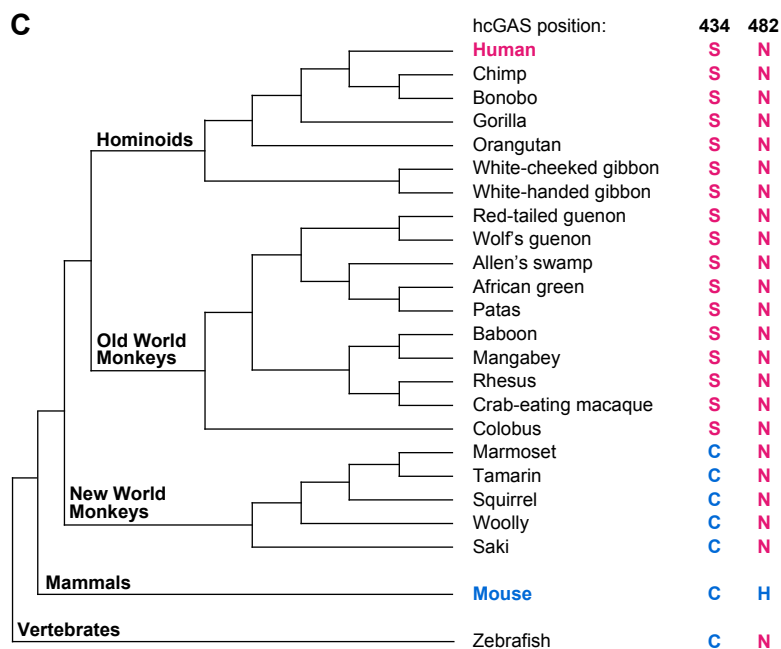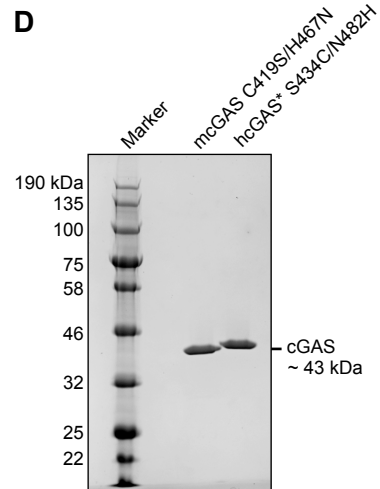

Supplement: NIHMS975849-supplement-7.pdf [file NIHMS975849-supplement-7.pdf]
